# Supplementary material for: Vesicular Trafficking of Incoming Human Papillomavirus 16 to the Golgi Apparatus and Endoplasmic Reticulum Requires γ-Secretase Activity
Source: PubMed Central journal article supplement — mBio. 2014 Sep 16;5(5):e01777-14. doi: 10.1128/mBio.01777-14 (PMC4172078; doi:10.1128/mbio.01777-14), 2014-09-16
Supplement: mbo005141997st1.pdf [file mbo005141997st1.pdf]

**Supplemental Table S1**

## qRT-PCR primers

APH1A:

5'-CCGCTTTGCCTACTACAAGC-3' and 5'-CCAAAAGGTATGGAGCAGGA-3'

Actin:

5'-CTGCTGTCACCTTCACCGTTCC-3' and 5'-AGTACTCCGTGTGGATCGGC-3'

Vps29:

5'-CAGTTTGCCAGCTAAATTCA-3' and 5'-TCAAATTGCCTCTGCAACAG-3'

HPV16 early genes:

5'-AATGTTTCAGGACCCACAGG-3' and 5'-CTCACGTGCGCAGTAACTGTTG-3'

GFP:

5'-ACGTAAACGGCCACAAGTTC-3' and 5'-AAGTCGTGCTGCTTCATGTG-3';

Furin:

5'-ACAACATATGGGACGCTGAGC-3' and 5'-TGGACACAGCTCTTCTGGTG-3'.

## siRNA sequences

APHA1A: AGUGGUGUCUUCUCUGUUA

Furin: GGACUUGGCAGGCAAUUUAU

Vps29: UCGAUGAGAAUCUGAAUUA
