# Supplementary material for: Vesicular Trafficking of Incoming Human Papillomavirus 16 to the Golgi Apparatus and Endoplasmic Reticulum Requires γ-Secretase Activity
Source: PubMed Central journal article supplement — mBio. 2014 Sep 16;5(5):e01777-14. doi: 10.1128/mBio.01777-14 (PMC4172078; doi:10.1128/mbio.01777-14), 2014-09-16
Supplement: mbo005141997st2.pdf [file mbo005141997st2.pdf]

**Supplemental Table S2**

| <b>Catalog No.</b> | <b>Reactivity</b>                    | <b>Source</b>            | <b>Application</b>                                      |
|--------------------|--------------------------------------|--------------------------|---------------------------------------------------------|
| ab21685            | anti-BiP rabbit antibody             | Abcam                    | PLA                                                     |
| ab50595            | anti-TGN46 rabbit antibody           | Abcam                    | PLA, immunofluorescence                                 |
| 3724               | anti-HA rabbit antibody              | Cell Signaling           | Immunofluorescence                                      |
| 11867423001        | anti-HA rat antibody                 | Roche                    | Flow cytometry                                          |
| 610822             | anti-GM130 mouse antibody            | BD Biosciences           | PLA                                                     |
| 554171             | anti-L1 mouse antibody               | BD Biosciences           | Immunoblotting                                          |
| F3165              | anti-FLAG mouse monoclonal antibody  | Sigma                    | PLA, immunofluorescence, neutralization, immunoblotting |
| sc-1615            | anti-actin goat antibody             | Santa Cruz Biotechnology | Immunoblotting                                          |
| sc-20132           | anti-PDI rabbit antibody             | Santa Cruz Biotechnology | PLA                                                     |
| 3288               | anti-EEA1 rabbit antibody            | Cell Signaling           | PLA                                                     |
| 2368               | anti-FLAG rabbit polyclonal antibody | Cell Signaling           | PLA                                                     |

Abcam, Cambridge, MA  
Cell Signaling, Danvers, MA  
Roche, Indianapolis, IN  
BD Biosciences, San Diego, CA  
Sigma, St. Louis, MO  
Santa Cruz Biotechnology, Santa Cruz, CA
